# Supplementary material for: Boosting the performance of an iontophoretic biosensing system with a graphene aerogel and Prussian blue for highly sensitive and noninvasive glucose monitoring
Source: Royal Society of Chemistry journal article supplement (doi:10.1039/d3an00212h), 2023-01-01
Supplement: d3an00212h1.pdf [file d3an00212h1.pdf]

## Electronic Supplementary Materials

*Boosting the performance of iontophoretic biosensing system  
with graphene aerogel and Prussian blue for highly sensitive  
and noninvasive glucose monitoring*

*Xiao Li,<sup>†</sup> Tong Li,<sup>†</sup> Baoyang Liu,<sup>†</sup> Ning Hu,<sup>†</sup> Tao Hu,<sup>†\*</sup> Zhonghua Ni<sup>†\*</sup>*

<sup>†</sup> School of Mechanical Engineering, and Jiangsu Key Laboratory for Design and  
Manufacture of Micro-Nano Biomedical Instruments, Southeast University, Nanjing  
211189, China

Corresponding Author.

\*E-mail: [nzh2003@seu.edu.cn](mailto:nzh2003@seu.edu.cn) (Zhonghua Ni), [hutao@seu.edu.cn](mailto:hutao@seu.edu.cn) (Tao Hu)

**This file contains:**

S1: Preparation of the electrode system

S2: Preparation of the GA@PB composites solution

S3: Preparation of the CTS/GO<sub>x</sub> composites solution

S4: Calculation method of sensitivity and limit of detection (LOD)

S5: Supporting figures: Fig. S1~S15

S6: Supporting table: Table S1~S2

## **S1: Preparation of the electrode system**

The geometry of the electrode system was designed with AutoCAD (Autodesk, San Rafael, CA) and the screen printing formes (Fig. S3) were outsourced for fabrication (Chuangzan Printing Equipment, Hangzhou, China) with the size of 15×25 cm<sup>2</sup>. Sequentially, silver ink, carbon ink, silver chloride ink and insulator ink were printed on PET film utilizing a small semi-automatic screen-printing machine-SPC-3050 (HF-Kejing, Hefei, China). After each printing step, the printed PET was placed in drying oven curing for 20 min at 90 °C, 90 °C, 70 °C, 90 °C respectively. Hereinto, silver, silver chloride, carbon and insulator ink were purchased from Shenzhen Baojiayi, Jinan Refreshing Electronic, Shenzhen Shengtianfeng Technology Co., Ltd, respectively. Polythylene terephthalate (PET) film was bought from Shanghai Feixia rubber & Plastic Hardware Co., Ltd.

## **S2: Preparation of the GA@PB composites solution**

Firstly, 0.02475 mmol  $\text{K}_3\text{Fe}(\text{CN})_6$  was added into 1 mL deionized water stirring 10 min and then 3 mL graphene oxide was dispersed to above-mentioned solution with stirring 1 h to prepare the mixture solution A. Secondly, dissolving 0.3 g LA and 0.05 mmol  $\text{FeCl}_3 \cdot 6\text{H}_2\text{O}$  in 3.5 mL deionized water obtained homogeneous mixture solution B. Finally, the GA@PB solution was compounded by adding the mixture solution A to B and then stirring for 10 min.

### **S3: Preparation of the CTS/GO<sub>x</sub> composites solution**

Firstly, 0.12 g acetic acid was mixed into 20 mL deionized water by sonic oscillation to prepare 0.1 M homogeneous acetic acid solution and then dissolving 0.1011 g chitosan in above-mentioned acetic acid solution was obtained 0.5 wt.% chitosan solution. Secondly, GO<sub>x</sub> solution (30 mg/mL) containing 10 mg/mL BSA stabilizer and chitosan solution was mixed in a 1:1 v/v ratio to prepare CTS and GO<sub>x</sub> mixture solution. Finally, 1% glutaraldehyde was added into the mixture solution as cross-linking agent in a 1:10 v/v ratio to obtain CTS/GO<sub>x</sub> composites solution.

#### **S4: Calculation method of sensitivity and limit of detection (LOD)**

The sensitivity and limit of detection (LOD) was calculated by the following equation (1) and (2), respectively.

$$\text{Sensitivity} = \frac{\Delta I}{\Delta c \cdot A} = \frac{S}{A} \quad \backslash * \text{MERGEFORMAT (1)}$$

$$\text{LOD} = \frac{3.3\sigma}{S} \quad \backslash * \text{MERGEFORMAT (2)}$$

where  $\Delta c$  is the change value of the glucose concentrations,  $\Delta I$  is the change value of the current density with  $\Delta c$ ,  $A$  is the area of the working electrode of the SPE,  $S = \frac{\Delta I}{\Delta c}$  is the slope value of the calibration curve,  $\sigma$  is the standard deviation of the current response value in PBS without glucose.

### S5: Supporting Figure: Fig. S1~S14

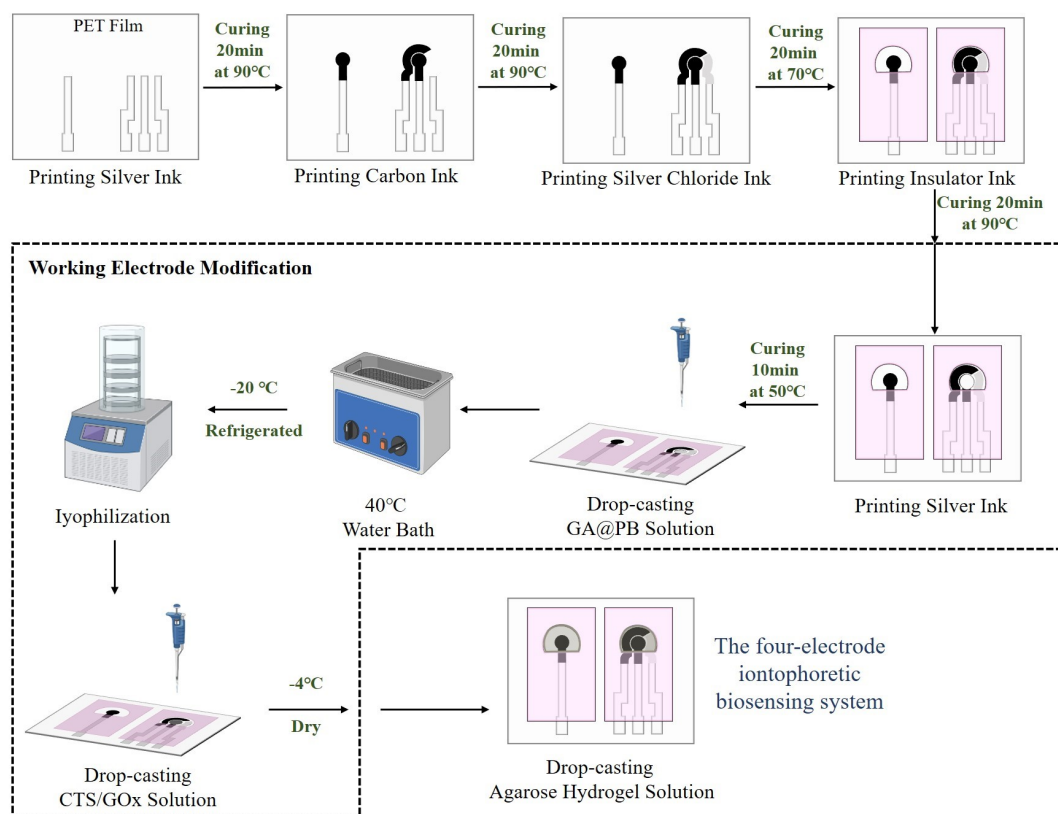

Fig. S1. Fabrication and chemical modification process of the four-electrode iontophoretic biosensing system.

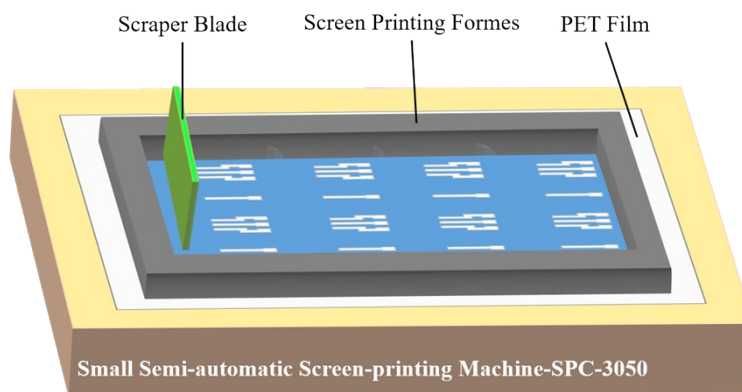

Fig. S2. Schematic diagram of screen-printing technique.

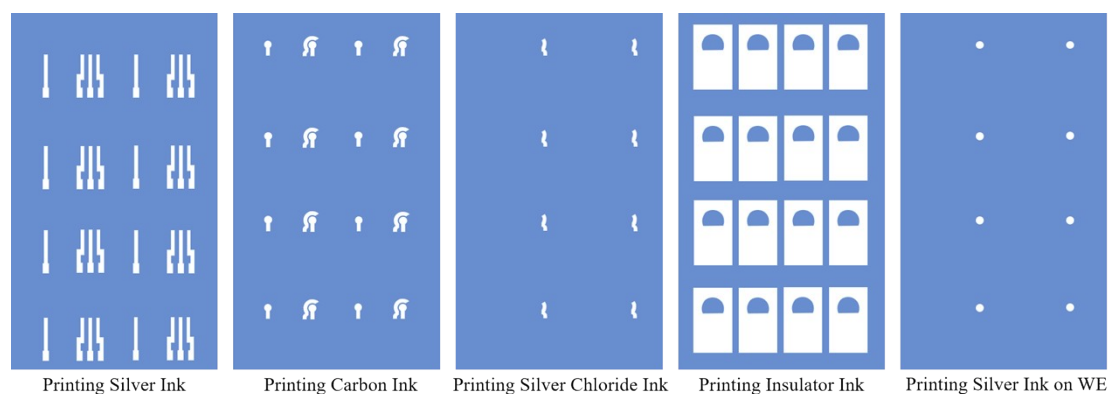

Fig. S3. Schematic diagram of the screen printing forms.

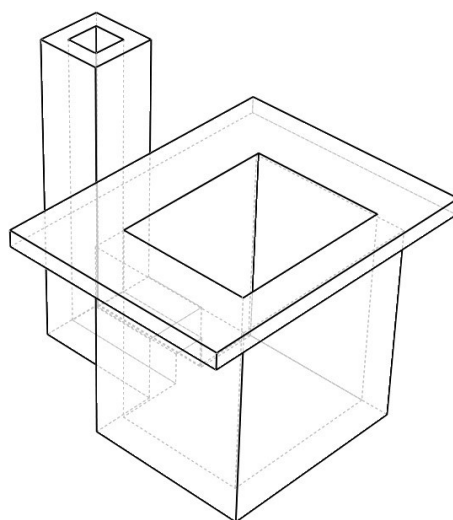

Fig. S4. The diffuse cell of the reverse iontophoretic experimental platform.

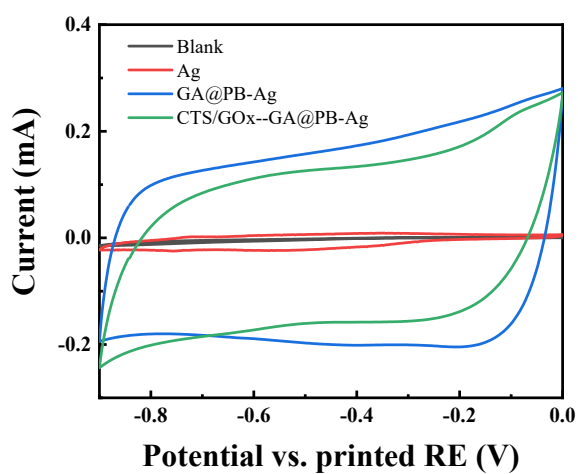

Fig. S5. CV curves of blank electrode (black line), printed Ag electrode (red line), GA@PB on Ag (denoted as GA@PB, blue line) and CTS/GOx-GA@PB on Ag (denoted as CTS/GOx-GA@PB, green line) at a scan rate of 50mV/s in 10 mM PBS.

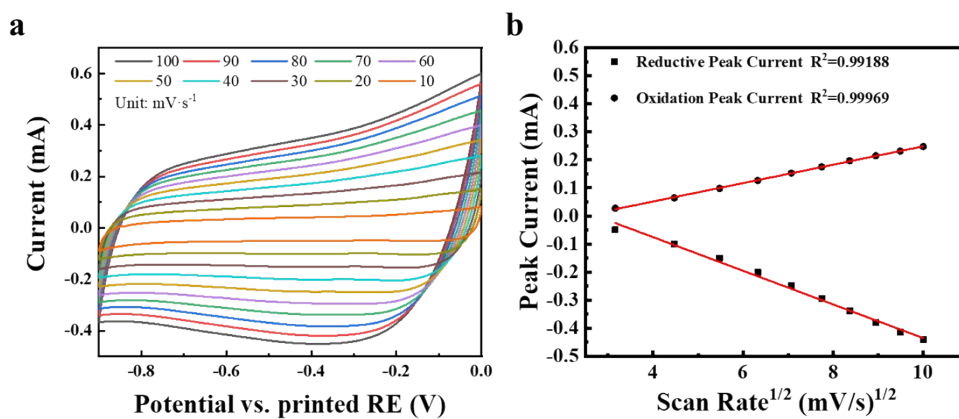

Fig. S6. (a) CV curves of printed Ag electrode modified with GA@PB at different scan rates in 10mM PBS. (b) Calibration curves of anodic and cathodic peak currents versus scanning velocity.

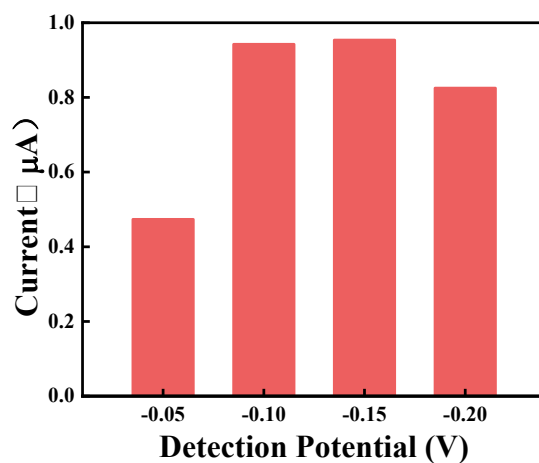

Fig. S7. Current responses of the analytical electrodes modified with CTS/GOx-GA@PB at different detection potential.

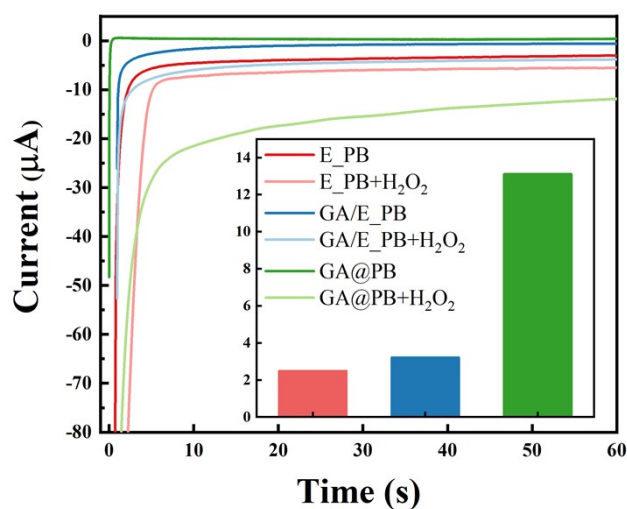

Fig. S8. Current responses of the analytical electrodes modified with electrodeposited PB (E<sub>PB</sub>, red line), GA with electrodeposited PB (GA/E<sub>PB</sub>, blue line) and GA@PB (green line) over the

same  $\text{H}_2\text{O}_2$  concentration (1 mM).

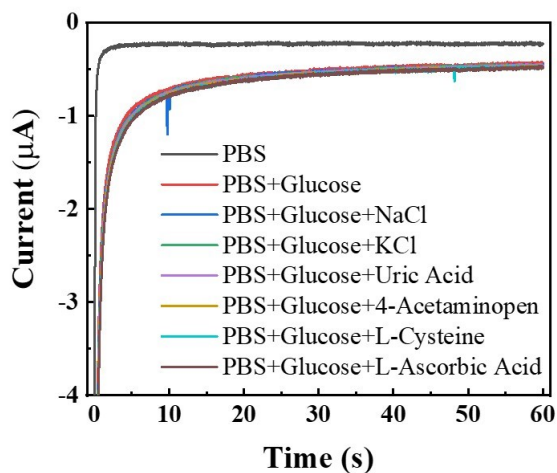

Fig. S9. Interference study. Chronoamperometric response in PBS with the presence of 50  $\mu\text{M}$  glucose and other common coexisting electroactive species.

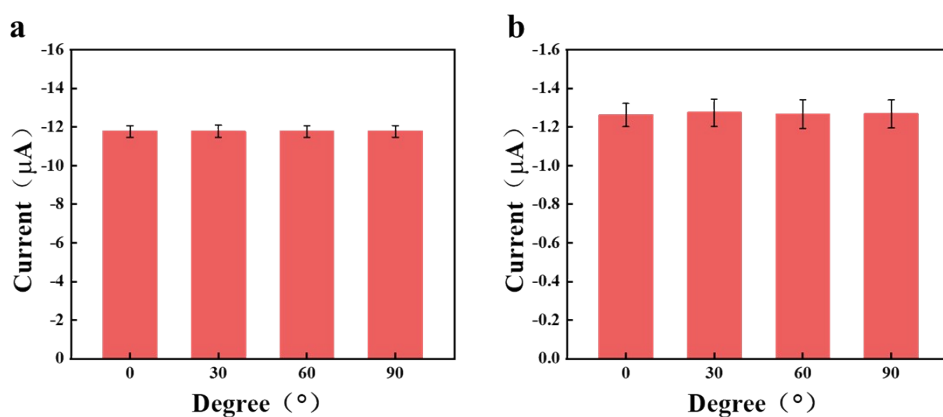

Fig. S10. The flexibility experiment about the analytical electrodes. (a) current responses of the analytical electrodes modified with GA@PB in 1 mM  $\text{H}_2\text{O}_2$ ; (b) current responses of the analytical electrodes modified with CTS/GOx-GA@PB in 300  $\mu\text{M}$  glucose.

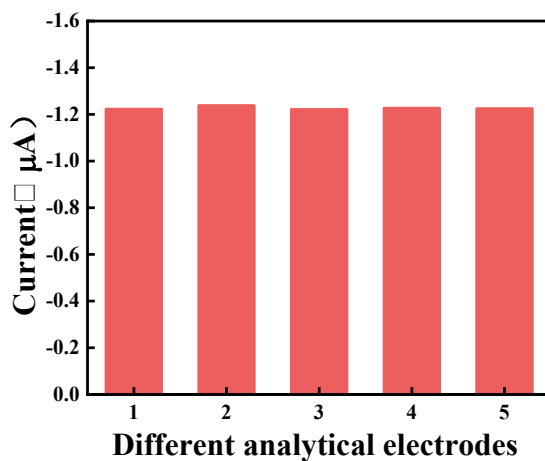

Fig. S11. Current responses of different analytical electrodes in the same glucose concentration (300  $\mu$ M) by chronoamperometry in 10 mM PBS (pH 7.4)

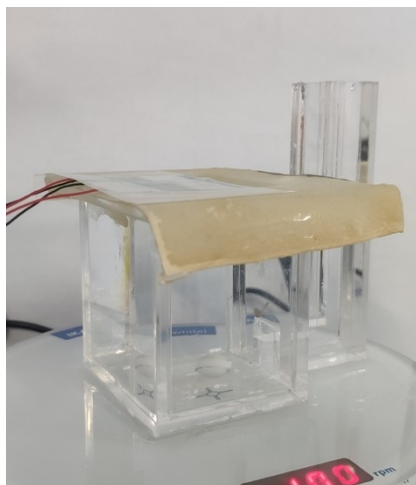

Fig. S12. Digital photograph of the self-developed reverse iontophoresis experimental platform.

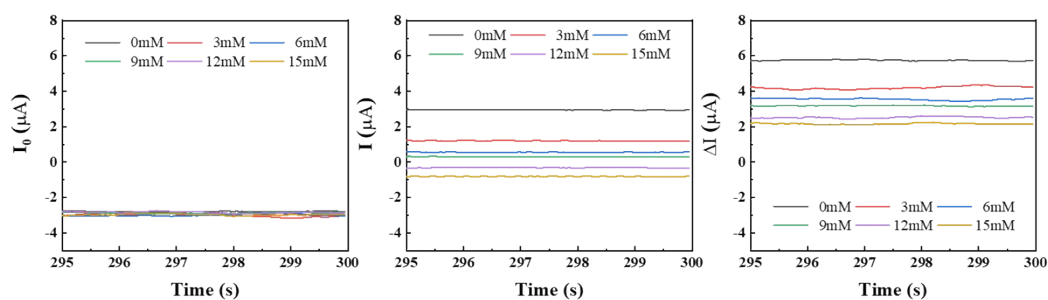

Fig. S13  $I$ ,  $I_0$  and  $\Delta I$  of the iontophoretic biosensing system on glucose sensing ranging from 0-15 mM..

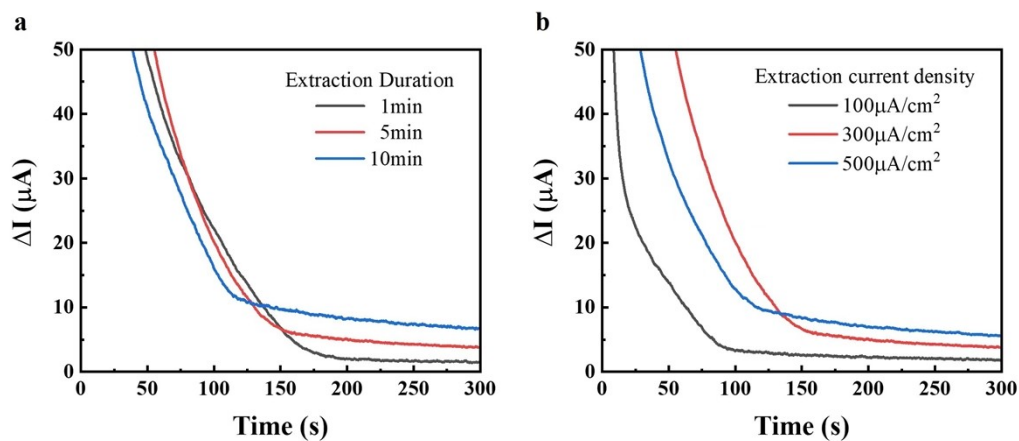

Fig. S14. Influence of extraction duration and current density during reverse iontophoresis on current responses. (A) Influence of extraction duration (extraction current density: 300  $\mu$ A  $\cdot$  cm $^{-2}$ ). (B) Influence of extraction current density (extraction duration: 5 min).

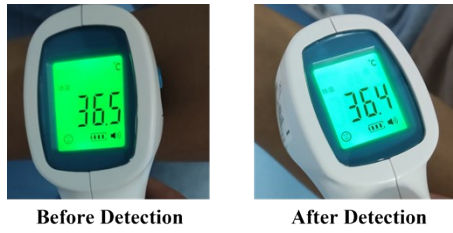

Fig. S15. The skin temperature before and after the detection on health volunteer.

## S6: Supporting table: Table S1~S2

Table S1 Comparison of previous H<sub>2</sub>O<sub>2</sub> biosensors

| Modified electrode | Sensitivity<br>( $\mu\text{A mM}^{-1} \text{ cm}^{-2}$ ) | Potential<br>(V) | Ref.             |
|--------------------|----------------------------------------------------------|------------------|------------------|
| <b>GA@PB</b>       | <b>80.30</b>                                             | <b>-0.1</b>      | <b>This work</b> |
| PB-FCNF/GCE        | 35.94                                                    | 0.12V            | [1].             |
| Ni-Fe PBA HNCs     | 36.13                                                    | 0.65             | [2].             |
| PB cube ink        | 27.25                                                    | -0.05            | [3].             |
| PB@Au              | 39.72                                                    | 0                | [4].             |

Table S2 Comparison of previous glucose biosensors based on reverse iontophoresis

| Modified electrode                                                 | Sensitivity<br>of Glucose<br>Detection<br>( $\mu\text{A cm}^{-2}$<br>$\text{mM}^{-1}$ ) | Sensitivity<br>of ISF<br>Glucose<br>Detection<br>( $\mu\text{A cm}^{-2}$<br>$\text{mM}^{-1}$ ) | Extraction<br>Current<br>Densities<br>( $\mu\text{A cm}^{-2}$ ) | Extraction<br>Durations<br>(min) | Additional<br>auxiliary | Ref.             |
|--------------------------------------------------------------------|-----------------------------------------------------------------------------------------|------------------------------------------------------------------------------------------------|-----------------------------------------------------------------|----------------------------------|-------------------------|------------------|
| <b>CTS/GO<sub>x</sub>-GA@PB</b>                                    | <b>15.11</b>                                                                            | <b>1.11</b>                                                                                    | <b>300</b>                                                      | <b>5</b>                         | <b>none</b>             | <b>This work</b> |
| Pt NPs/graphene/Au<br>Nafion/GO <sub>x</sub>                       | 2.29                                                                                    | 0.38216                                                                                        | 150                                                             | 480<br>(incessantly)             | thermal<br>activated    | [5].             |
| PB Ink Nafion/<br>glutaraldehyde/GO <sub>x</sub>                   | 5.66                                                                                    | 0.2866                                                                                         | 270                                                             | 480<br>(incessantly)             | none                    | [6].             |
| PB Ink HEMA/<br>DMAEMA/EG/GO <sub>x</sub>                          | 9.4                                                                                     | 0.094                                                                                          | 130                                                             | 480<br>(incessantly)             | none                    | [7].             |
| PB Ink<br>Tetrahydronaphthalene/<br>Glutaraldehyde/GO <sub>x</sub> | 4.635                                                                                   | 0.04635                                                                                        | 250                                                             | 30                               | none                    | [8].             |
| Ferrocene/GO <sub>x</sub>                                          | 0.037                                                                                   | 0.00545                                                                                        | 300                                                             | 90                               | none                    | [9].             |
| MWCNT epoxy/GO <sub>x</sub>                                        | 0.694                                                                                   | 0.021                                                                                          | 300                                                             | 90                               | none                    | [10].            |

1. L. Wang, Y. Ye, H. Zhu, Y. Song, S. He, F. Xu and H. Hou, *Nanotechnology*, 2012, 23, 455502.
2. Q. Niu, C. Bao, X. Cao, C. Liu, H. Wang and W. Lu, *Biosens Bioelectron*, 2019, 141, 111445.
3. J. Ma, Y. Jiang, L. Shen, H. Ma, T. Sun, F. Lv, A. Kiran and N. Zhu, *Biosens Bioelectron*, 2019, 144, 111637.
4. P. Ni, Y. Zhang, Y. Sun, Y. Shi, H. Dai, J. Hu and Z. Li, *RSC Advances*, 2013, 3.
5. Z. H. Pu, X. G. Zhang, H. X. Yu, J. A. Tu, H. L. Chen, Y. C. Liu, X. Su, R. D. Wang, L. Zhang and D. C. Li, *Science Advances*, 2021, 7.
6. E. De la Paz, A. Barfidokht, S. Rios, C. Brown, E. Chao and J. Wang, *Anal Chem*, 2021, 93, 12767-12775.
7. G. J. Kim and K. O. Kim, *Sci Rep*, 2020, 10, 18858.
8. E. K. Varadharaj and N. Jampana, *ECS Electrochemistry Letters*, 2015, 4, B13-B16.
9. C. T. Ching, T. P. Sun, S. H. Huang, H. L. Shieh and C. Y. Chen, *Ann Biomed Eng*, 2010, 38, 1548-1555.
10. T.-P. Sun, H.-L. Shieh, C. T.-S. Ching, Y.-D. Yao, S.-H. Huang, C.-M. Liu, W.-H. Liu and C.-Y. Chen, *International Journal of Nanomedicine*, 2010, 5, 343-349.
